# Supplementary material
Source: PubMed Central journal article supplement (PMC2396703)
Supplement: 0801215105_Supplemental_PDF.pdf [file 0801215105_Supplemental_PDF.pdf]

# Supporting Information

Tsuge et al. 10.1073/pnas.0801215105

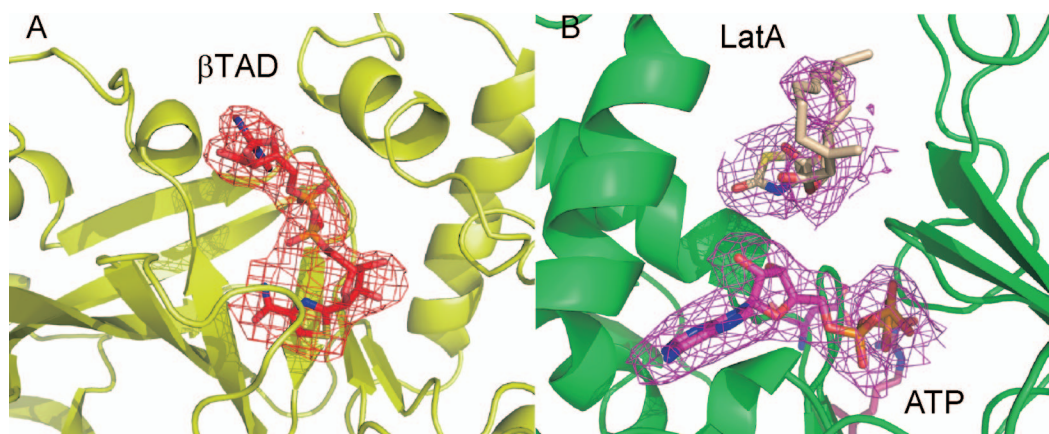

**Fig. S1.** The electron density of  $\beta$ TAD, ATP, and latrunculin A. (A) Omit  $2F_o - F_c$  maps around  $\beta$ TAD at  $2\sigma$ . (B) Omit  $2F_o - F_c$  maps around ATP and latrunculin A at  $2\sigma$ .

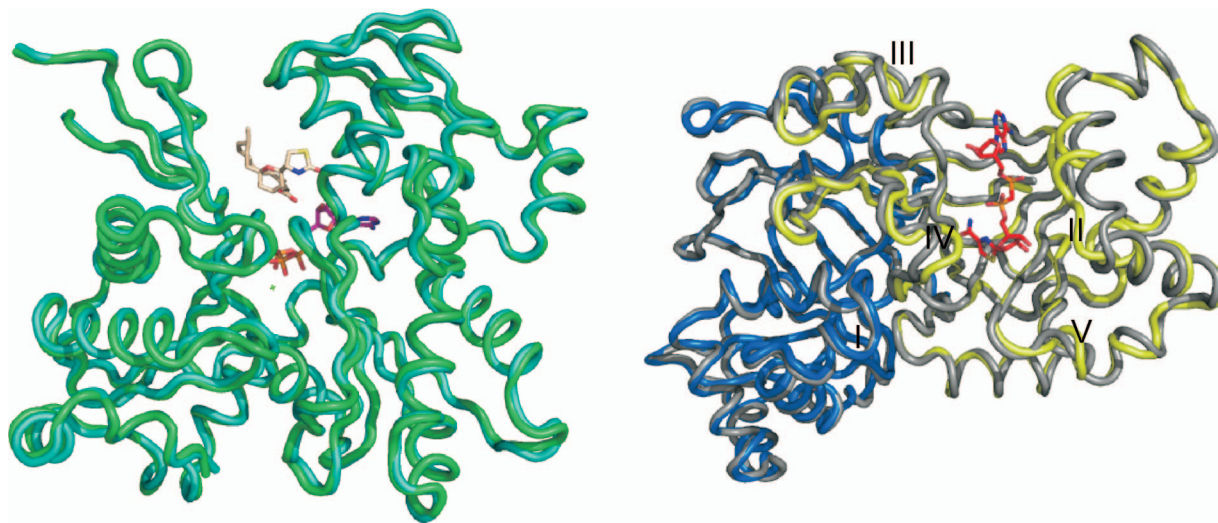

**Fig. S2.** Structural comparisons of Ia or actin in complex and as a monomer. (A) Structural comparison of actin in complex (green) and as a monomer (cyan). (B) Structural comparison of Ia in complex (N-term:marine, C-term:yellow) and as a monomer (gray). Roman numerals (I–V) show the five binding loops in Ia.







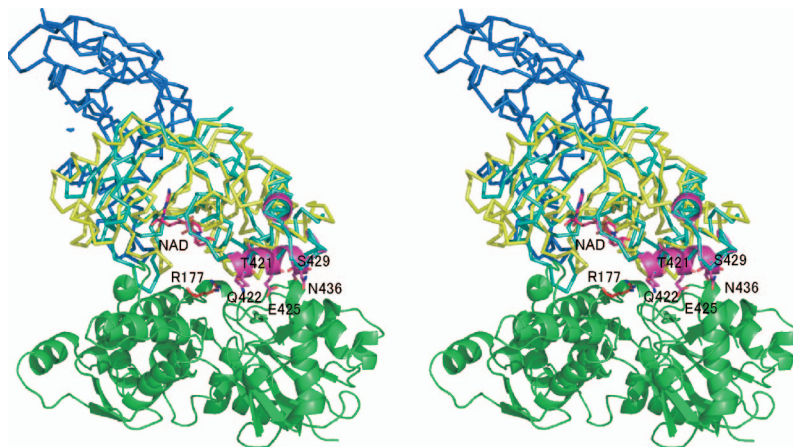

**Fig. S5.** Stereo of the model structure of actin(green)–SpvB(cyan) complex. Ia is shown in the same color as Fig. 1. The helical insertion of SpvB (residues 415–445) is shown in purple. The actin-binding residues on the helical insertion, Arg-177 of actin, and NAD are labeled.

**Table S1. Data collection and structure refinement statistics**

| Unit cell/space group             | $a = 57.0 \text{ \AA}$ , $b = 126.3 \text{ \AA}$ , $c = 147.1 \text{ \AA}$<br>P212121 |
|-----------------------------------|---------------------------------------------------------------------------------------|
| Beamline                          | PF-AR NW12                                                                            |
| Wavelength                        | 1.0 \AA                                                                               |
| Temperature                       | 100 K                                                                                 |
| Resolution                        | 50–2.8 \AA                                                                            |
| Number of reflections             | 26,445 (2,580)                                                                        |
| Completeness                      | 99.4 (99.7)                                                                           |
| $R_{\text{sym}}$                  | 0.070 (0.337)                                                                         |
| $I/\sigma$                        | 15.3                                                                                  |
| Redundancy                        | 6.4                                                                                   |
| Solvent content                   | 58.3%                                                                                 |
| Matthews coefficient              | 2.2                                                                                   |
| Proteins                          | One actin [5–374 (40–49 missing)] and one Ia (1–413)                                  |
| Ligand/ion                        | $\beta$ TAD, ATP, latrunculin A, calcium, 79 waters                                   |
| $R_{\text{work}}/R_{\text{free}}$ | 0.223/0.296                                                                           |
| rmsd                              |                                                                                       |
| Bond length, \AA/ bond angle, °   | 0.023/2.198                                                                           |
| Mean B value (all)                | 49.6                                                                                  |
| Mean B value (Ia)                 | 48.9                                                                                  |
| Mean B value (actin)              | 50.3                                                                                  |
| Mean B value (water)              | 38.8                                                                                  |

\*Values in parentheses are for the last resolution shell.

<sup>†</sup> $R_{\text{sym}} = \frac{\sum_h \sum_i |I_i(h) - \langle I(h) \rangle|}{\sum_h \sum_i I_i(h)}$ , where  $I_i(h)$  is the intensity measurement for a reflection  $h$ , and  $\langle I(h) \rangle$  is the mean intensity for this reflection.

<sup>‡</sup> $R_{\text{work}} = \frac{\sum_h ||F_{\text{obs}}| - |F_{\text{calc}}||}{\sum_h |F_{\text{obs}}|}$ .

<sup>§</sup> $R_{\text{free}}$  was calculated with randomly selected reflections (5%).
